# Supplementary material for: Efficacy and safety of margetuximab plus chemotherapy vs. trastuzumab plus chemotherapy in Chinese patients with pretreated HER2-positive advanced metastatic breast cancer: results from a randomized, open-label, multicenter, phase II bridging study
Source: PubMed Central journal article supplement — Transl Breast Cancer Res. 2022 Oct 31;3:31. doi: 10.21037/tbcr-22-35 (PMC11093073; doi:10.21037/tbcr-22-35), 2022-10-31
Supplement: tbcr-03-31-dss.pdf [file tbcr-03-31-dss.pdf]

## Data Sharing Statement

|                     |                                                                                                                                                    |                                                                   |
|---------------------|----------------------------------------------------------------------------------------------------------------------------------------------------|-------------------------------------------------------------------|
| <b>Article Info</b> | <a href="https://dx.doi.org/10.21037/tbcr-22-35">https://dx.doi.org/10.21037/tbcr-22-35</a>                                                        |                                                                   |
| <b>Item</b>         | <b>Question</b>                                                                                                                                    | <b>Authors' Response<br/>(place "-" if not applicable)</b>        |
| 1                   | Would you like to share data collected for your study to others?                                                                                   | Yes                                                               |
| 2                   | If not, would you like to share the reason for your decision?                                                                                      | -                                                                 |
| 3                   | What data in particular will be shared?                                                                                                            | Patient survival data.                                            |
| 4                   | Any other documents will be share? Such as study protocol, statistical analysis plan, informed consent form, clinical study report, analytic code. | No                                                                |
| 5                   | When will data availability begin?                                                                                                                 | From the publication date onwards.                                |
| 6                   | When will data availability end?                                                                                                                   | Two years within the publication date, since data may be updated. |
| 7                   | To whom will you share the data?                                                                                                                   | Medical oncologists and breast surgeons                           |
| 8                   | For what type of analysis or purpose?                                                                                                              | N/A                                                               |
| 9                   | How or where can the data/documents be obtained?                                                                                                   | Corresponding author (jzf_cscobc@cscoc.org.cn)                    |
| 10                  | Any other restrictions?                                                                                                                            | Each request will be considered individually                      |
