# Supplementary material for: Efficacy and safety of margetuximab plus chemotherapy vs. trastuzumab plus chemotherapy in Chinese patients with pretreated HER2-positive advanced metastatic breast cancer: results from a randomized, open-label, multicenter, phase II bridging study
Source: PubMed Central journal article supplement — Transl Breast Cancer Res. 2022 Oct 31;3:31. doi: 10.21037/tbcr-22-35 (PMC11093073; doi:10.21037/tbcr-22-35), 2022-10-31
Supplement: tbcr-03-31-supplementary.pdf [file tbcr-03-31-supplementary.pdf]

**Table S1** Participating sites and ethical approval

| Name and location of participating site                                                                    | Name of ethics committee                                                                                          | Approval number          |
|------------------------------------------------------------------------------------------------------------|-------------------------------------------------------------------------------------------------------------------|--------------------------|
| Harbin Medical University Cancer Hospital, Heilongjiang, China                                             | Institutional Ethics Committee of Harbin Medical University Cancer Hospital                                       | 2020-57                  |
| Hunan Cancer Hospital, Hunan, China                                                                        | Medical Ethics Committee of Hunan Cancer Hospital                                                                 | 2021-31                  |
| The First Hospital of Jilin University, Jilin, China                                                       | Institutional Ethics Committee of The First Hospital of Jilin University                                          | 20Y062-003               |
| Queen Mary Hospital, Hong Kong, China                                                                      | Institutional Review Board of the University of Hong Kong/Hospital Authority Hong Kong West Cluster               | UW 19-515                |
| Zhejiang Cancer Hospital, Zhejiang, China                                                                  | Medical Ethics Committee of Zhejiang Cancer Hospital                                                              | IRB-[2021]10             |
| The Affiliated Cancer Hospital of Zhengzhou University, Henan Cancer Hospital, Henan, China                | Medical Ethics Committee of Henan Cancer Hospital                                                                 | 2019122507               |
| Taiwan University Hospital, Taiwan, China                                                                  | Research Ethics Committee A of Taiwan University Hospital                                                         | 201909065MSA             |
| Xuzhou Central Hospital, Jiangsu, China                                                                    | Xuzhou Central Hospital Biomedical Research Ethics Committee                                                      | XZXY-LY-20201228-2020017 |
| The Second People's Hospital of Neijiang, Sichuan, China                                                   | Ethics Committee of Neijiang Second People's Hospital                                                             | 2020-006-004             |
| The First Affiliated Hospital of Anhui Medical University, Anhui, China                                    | Ethics Committee of The First Affiliated Hospital of Anhui Medical University                                     | PJ2020-12-01(1)          |
| Peking University Cancer Hospital and Institute, Beijing, China                                            | Medical Ethics Committee of Peking University Cancer Hospital and Institute                                       | 2020YW08-ZY03            |
| The First Affiliated Hospital of Xiamen University, Fujian, China                                          | Ethics Committee of The First Affiliated Hospital of Xiamen University                                            | XMYY-2020Y018-05         |
| Linyi Cancer Hospital, Shandong, China                                                                     | Ethics Committee of Linyi Cancer Hospital                                                                         | XY2009                   |
| Ruijin Hospital, Shanghai Jiao Tong University School of Medicine, Shanghai, China                         | Ethics Committee of Ruijin Hospital, Shanghai Jiao Tong University School of Medicine                             | 2020-23-3                |
| The Affiliated Hospital of Qingdao University, Shandong, China                                             | Ethics Committee of The Affiliated Hospital of Qingdao University                                                 | QYFYEC 2020-045-02       |
| Jiangsu Provincial People's Hospital, Jiangsu, China                                                       | Ethics Committee of Jiangsu Provincial People's Hospital                                                          | 2020-MD-094.A2           |
| Liaoning Cancer Hospital & Institute, Liaoning, China                                                      | Medical Ethics Committee of Liaoning Cancer Hospital                                                              | 20201157                 |
| Union Hospital, Tongji Medical College, Huazhong University of Science and Technology, Hubei, China        | Medical Ethics Committee of Union Hospital, Tongji Medical College, Huazhong University of Science and Technology | 2020-0163-02             |
| Tri-Service General Hospital, Taiwan, China                                                                | Institutional Review Board of Tri-Service General Hospital                                                        | 2-108-01-019             |
| The Affiliated Hospital of Jiangnan University (The Fourth People's Hospital in Wuxi City), Jiangsu, China | Ethics Committee of The Affiliated Hospital of Jiangnan University                                                | 2020LL020-02             |
| The First Affiliated Hospital of Xi'an Jiao Tong University, Shaanxi, China                                | Medical Ethics Committee of The First Affiliated Hospital of Xi'an Jiao Tong University School of Medicine        | XJTUIAF2020LSY-38-2      |
| Sun Yat-sen University Cancer Center, Guangdong, China                                                     | Medical Ethics Committee of Sun Yat-sen University Cancer Center                                                  | A2020-063-03             |
| The First Affiliated Hospital of USTC (Anhui Provincial Hospital), Anhui, China                            | Clinical Trial Ethics Committee of The First Affiliated Hospital of USTC                                          | 2020-467                 |
| The First Affiliated Hospital of Zhejiang University, Zhejiang, China                                      | Clinical Trial Ethics Committee of The First Affiliated Hospital of Zhejiang University School of Medicine        | 2021-24                  |
| Huai'an First People's Hospital, Jiangsu, China                                                            | Clinical Trial Ethics Committee of Huai'an First People's Hospital                                                | YW-2020-012-05           |
| Hubei Cancer Hospital, Wuhan, China                                                                        | Ethics Committee of Hubei Cancer Hospital                                                                         | 2021-7                   |
| The First Affiliated Hospital of Bengbu Medical College, Anhui, China                                      | Ethics Committee of The First Affiliated Hospital of Bengbu Medical College                                       | 2020-017X03              |
| The First Hospital of China Medical University, Liaoning, China                                            | Medical Ethics Committee of The First Hospital of China Medical University                                        | 2020YL042                |
| The Fifth Medical Center of Chinese PLA General Hospital, Beijing, China                                   | Ethics Review Group of The Fifth Medical Center of Chinese PLA General Hospital                                   | 2020-1-2-1               |
